# Mutation of a conserved Gln residue does not abolish desensitization of acid-sensing ion channel 1

Matthew L Rook<sup>1</sup>, Megan Miaro<sup>2</sup>, Tyler Couch<sup>1</sup>, Dana L Kneisley<sup>3</sup>, Maria Musgaard<sup>2</sup> and David M. MacLean<sup>3\*</sup>

<sup>1</sup>Graduate Program in Cellular and Molecular Pharmacology and Physiology, University of Rochester Medical Center, NY, USA

<sup>2</sup>Department of Chemistry and Biomolecular Sciences, University of Ottawa, Ottawa, Canada

<sup>3</sup>Department of Pharmacology and Physiology, University of Rochester Medical Center, NY, USA

\*To whom correspondence should be addressed

Keywords: Acid-sensing ion channels, ASICs, gating, desensitization

1 **Abstract**

2 Desensitization is a common feature of ligand-gated ion channels although the molecular  
3 cause varies widely between channel types. Mutations that substantially reduce or abolish  
4 desensitization have been described for many ligand-gated ion channels including  
5 glutamate, GABA, glycine and nicotinic receptors but not for acid-sensing ion channels  
6 (ASICs) until recently. Mutating Gln276 to a glycine in human ASIC1a was reported to  
7 mostly abolish desensitization at both the macroscopic and single channel levels,  
8 potentially providing a valuable tool for subsequent studies. However, we find that in both  
9 human and chicken ASIC1 the effect of Q276G is modest. In chicken ASIC1, the  
10 equivalent Q277G slightly reduces desensitization when using pH 6.5 as a stimulus but  
11 desensitizes essentially like wild type when using more acidic pH values. In addition,  
12 steady-state desensitization is intact, albeit right-shifted, and recovery from  
13 desensitization is accelerated. Molecular dynamics simulations indicate that the Gln277  
14 side chain participates in a hydrogen bond network that might stabilize the desensitized  
15 conformation. Consistent with this, destabilizing this network with the Q277N or Q277L  
16 mutations largely mimics the Q277G phenotype. In human ASIC1a, Q276G does not  
17 substantially reduce desensitization but surprisingly slows entry to and exit from the  
18 desensitized state, thus requiring longer agonist applications to reach equilibrium. Our  
19 data reveal that while the Q/G mutation does not substantially impair desensitization as  
20 previously reported, it does point to unexpected differences between chicken and human  
21 ASICs and the need for careful scrutiny before using this mutation in future studies.

## 1 Introduction

2 Desensitization is a near-ubiquitous feature of ligand-gated ion channels (LGICs),  
3 which was first described more than 60 years ago<sup>1</sup>. In general, desensitization is thought  
4 to act as a protective mechanism, terminating aberrant signaling although other roles are  
5 possible<sup>2-4</sup>. As such, the molecular basis of desensitization has been a subject of inquiry  
6 for every type of LGIC. Mutations that essentially abolish or substantially reduce  
7 desensitization have been reported for glutamate, GABA, glycine and nicotinic receptors<sup>5-</sup>  
8 <sup>10</sup>. While there have been controversies surrounding the microscopic mechanisms of  
9 particular cases<sup>11</sup>, these mutations have been enormously helpful in driving structure-  
10 function investigations of desensitization as well as the insight into the physiological  
11 role<sup>12</sup>. Until recently, no such mutations had been reported for acid-sensing ion channels  
12 (ASICs).

13 ASICs are sodium-selective pH-activated trimeric ion channels. They are  
14 expressed widely in the central and peripheral nervous systems, as well as other  
15 tissues<sup>13</sup>. Given the ubiquity of the ligand, it is unsurprising that ASICs are implicated in  
16 a host of physiological processes and disease states including ischemic cell death, fear  
17 and anxiety, learning and memory, pain, muscle fatigue, migraine, bone morphogenesis,  
18 inflammation and cancer<sup>14-16</sup>. In mammals, the ASIC family includes four proton-sensitive  
19 members: ASIC1a, ASIC1b, ASIC2a and ASIC3. The individual subunits all have the  
20 same topology with intracellular amino and carboxy terminal tails of approximately 20 to  
21 80 amino acid residues, separated by a large extracellular domain, two transmembrane  
22 helices and a small amino terminal re-entrant loop<sup>17,18</sup>. The extracellular domain is divided  
23 into distinct thumb, finger, knuckle, palm, and  $\beta$ -ball domains (Figure 1A). ASIC activation

24 by acidic conditions is believed to occur through protonation of distinct residues in the  
25 interface between the thumb and finger as well as a cluster of acidic side chains in the  
26 palm domain<sup>17,19-21</sup>. Protonation also triggers desensitization, either with mild acidic  
27 stimuli (pH in the 7.4-6.9 range), which leads to steady-state desensitization (SSD) in the  
28 absence of channel activation, or with strong stimuli (i.e., pH 6.8-4) which also opens the  
29 channel. Desensitization depends on the isomerization or swivel of a critical linker in the  
30 palm domain, which connects the 11<sup>th</sup> and 12<sup>th</sup>  $\beta$  strands<sup>22,23</sup>. This linker is composed of  
31 Leu414 and Asn415 (Figure 1B) and in the resting and open states, the Leu residue points  
32 outward, away from the central axis of the channel. However, in the desensitized state  
33 these amino acid residues essentially switch positions, with Leu414 swiveling downward  
34 and in towards the central axis. It has been suggested that Gln276 (Gln277 in chicken  
35 ASIC1) acts as a valve to prevent linker rotation, stabilizing the desensitized state and,  
36 furthermore, that eliminating the 276 side chain using the Q276G mutation in effect  
37 produces a 'leaky' valve which enables channels to readily escape desensitization and  
38 remain open<sup>24</sup>.

39 To further study the Q276G mutant and relate it to the majority of structural data,  
40 we tested the Q276G equivalent in cASIC1 (Q277G) using piezo-driven fast perfusion in  
41 excised patches. We found that when using pH 6.5 to open the channels, cASIC1 Q277G  
42 does have slightly reduced desensitization, however, when using more acidic stimuli  
43 Q276G behaves essentially like wild type with desensitization principally intact. Moreover,  
44 we found that Q277G accelerates recovery from desensitization by orders of magnitude  
45 and reduces the apparent stability of the desensitized state. Based on molecular  
46 dynamics simulations, we hypothesize that Gln277 coordinates a series of hydrogen

47 bonds within the palm domain, thereby stabilizing the desensitized conformation.  
48 Consistent with this electrostatic mechanism, a slight mutation to Q277N or Q277L also  
49 accelerates recovery from desensitization. Finally, we find that hASIC1a Q276G exhibits  
50 robust pH-dependent desensitization, in contrast to prior work.

## 1 **Materials and Methods**

### 2 *HEK ASIC knockout cell creation*

3 A guide RNA sequence (GGCTAAAGCGGAACTCGTTG-PAM) targeting the coding  
4 region of *ASIC1* was cloned into BbsI-linearized pSpCas9(BB)-2A-GFP vector (a kind gift  
5 from Feng Zhang, Addgene plasmid #48138) as previously described<sup>25</sup>. Transfected  
6 human embryonic kidney cells (HEK293, ATCC number CRL-3216) cells were verified  
7 for GFP expression and clonally expanded following serial dilution. Clonal lines were  
8 screened for on-target genome editing by Sanger sequencing of PCR products (Fwd  
9 TTGGAGGAACCCTGGATGTGTC, Rev TAACTCCTCTGCTGTGAGTGGC). Knock-out  
10 was confirmed by Western blotting. Briefly, 10<sup>5</sup> cell equivalents of RIPA lysate from the  
11 parental cell line, knockout clone, and clone transiently transfected with human ASIC1a  
12 cDNA were resolved on an acrylamide gel and transferred to nitrocellulose membranes.  
13 Blots were blocked with bovine serum albumin and probed with an ASIC1-specific  
14 antibody (NeuroMab clone N271/44) overnight at a 1:1000 dilution. Blots were washed  
15 with Tris-buffered saline supplemented with 0.1% Tween-20 and probed with goat anti-  
16 mouse IgG HRP-conjugated secondary. Blots were imaged with an Azure 300 Imaging  
17 System. After inactivation of HRP with sodium azide, the blot was probed again with  
18 Direct-Blot HRP anti-GAPDH (Biolegend) antibody as a loading control.

### 19 *Cell culture, mutagenesis and transfection.*

20 HEK293T ASIC knockout (KO) cells were maintained in Dulbecco's Modification of  
21 Eagle's Medium (DMEM) with 4.5 g/L glucose, L-glutamine & sodium pyruvate  
22 (Corning/Mediatech, Inc.) or Minimum Essential Medium (MEM) with Glutamax & Earle's  
23 Salts (Gibco), supplemented with 10% FBS (Atlas Biologicals) and penicillin/streptomycin

24 (Invitrogen). Cells were passaged every 2 to 3 days when approximately 90% confluence  
25 was achieved. HEK293 KO cells were plated on tissue culture treated 35 mm dishes,  
26 transfected 24 to 48 hours later and recorded from 12-48 hours post-transfection. Cells  
27 were transiently transfected with the indicated ASIC construct and eGFP using an  
28 ASIC:eGFP ratio of between 2.5 - 10:1  $\mu$ g of cDNA per 10 mL of media, depending on  
29 the construct. For hASIC1a wild type whole cell experiments (Figure 6), a ratio of  
30 0.25:0.25:1  $\mu$ g of hASIC1a, eGFP and pUC empty vector was used. Transfections were  
31 performed using polyethylenimine 25k (PEI 25k, Polysciences, Inc) following  
32 manufacturer's instructions, with media change at 1 to 8 hours post-transfection.  
33 Mutations were introduced using site-directed mutagenesis PCR and confirmed by  
34 sequencing (Fisher Scientific/Eurofins Genomics).

### 35 *Electrophysiology*

36 Culture dishes were visualized with phase contrast on a Nikon Ti2 microscope using a  
37 20x objective. GFP was excited using a 455 nm or 470 nm LED (Thorlabs) and dichroic  
38 filter cube for emission detection. Outside-out patches were excised using heat-polished,  
39 thick-walled borosilicate glass pipettes of 3 to 15 M $\Omega$  resistance. The pipette internal  
40 solution contained (in mM) 135 CsF, 33 CsOH, 11 EGTA, 10 HEPES, 2 MgCl<sub>2</sub> and 1  
41 CaCl<sub>2</sub> (pH 7.4). External solutions with pH values greater than 7 were composed of (in  
42 mM) 150 NaCl, 10 HEPES, 1 CaCl<sub>2</sub> and 1 MgCl<sub>2</sub> with pH values adjusted to their  
43 respective values using NaOH. For solutions with a pH value lower than 7, HEPES was  
44 replaced with MES. All recordings were performed at room temperature with a holding  
45 potential of -60 mV using an Axopatch 200B amplifier (Molecular Devices). Data were  
46 acquired using AxoGraph software (Axograph) at 20 kHz, filtered at 10 kHz and digitized

47 using a USB-6343 DAQ (National Instruments). Series resistance was routinely  
48 compensated by 90 to 95% where the peak amplitude exceeded 100 pA. Rapid perfusion  
49 was performed using home-built, double- or triple-barrel application pipettes (Vitrocom),  
50 manufactured according to a prior method<sup>26</sup>. Application pipettes were translated using  
51 piezo actuators driven by voltage power supplies. The command voltages were generally  
52 low pass filtered (50-100 Hz, eight-pole Bessel). Whole cell recording (Supplemental  
53 Figure 1, Figure 6) used identical conditions except patch pipette and application pipette  
54 diameters tended to be larger.

### 55 *Molecular Dynamics Simulations*

56 The systems for molecular dynamics simulations were constructed using the cASIC1  
57 structure proposed to illustrate the desensitized state (PDB ID: 4NYK; resolution: 3.00  
58 Å)<sup>27</sup>. Residues 42-455 were resolved in the crystal structure; of these 23 residues had  
59 missing atoms which were added using Modeller v9.21<sup>28</sup>. The model was oriented for  
60 placement in a lipid bilayer by aligning the complete structure with the corresponding  
61 structure from the Orientations of Proteins in Membranes (OPM) database<sup>29</sup>. Protonation  
62 states of specific residues were set using *pdb2gmx* during the system setup in  
63 GROMACS<sup>30</sup>. In all cases, residues Glu98, His111, Glu239, His328, Glu354, Glu374,  
64 Asp408 and Asp433 were protonated, leaving the acidic residues neutral and histidine  
65 residues with a positive charge. This was considered the “background” protonation setup  
66 and the purpose was to maintain an overall stable protein structure. However, the  
67 importance of the presence of these individual protons was not tested in this study as  
68 they are relatively far away from our region of interest. On the given background, Glu80,



69 Glu412 and Glu417 were protonated or deprotonated in accordance with the table below  
70 to test the importance of protonation of these specific residues.

|      | H/H/H | H/H/- | H/-/H | -/H/H | H/-/- | -/H/- | -/-/H | -/-/- |
|------|-------|-------|-------|-------|-------|-------|-------|-------|
| E80  | H     | H     | H     | -     | H     | -     | -     | -     |
| E412 | H     | H     | -     | H     | -     | H     | -     | -     |
| E417 | H     | -     | H     | H     | -     | -     | H     | -     |

71  
72 The Charmm36m force field was applied<sup>31</sup>. The initial POPC lipid bilayer (120 Å x 120 Å)  
73 was generated using the membrane builder of the CHARMM-GUI with 4NYK inserted  
74 using the replacement method<sup>32</sup>. The protein structures with different protonation states  
75 were then inserted into this original lipid bilayer using the InflateGro method<sup>33</sup>. The  
76 crystallographic water molecules and chloride ions were retained. Water molecules  
77 (TIP3P model<sup>34</sup>) were further generated to fill the box (120 Å x 120 Å x 161 Å) with  
78 solvent, and sodium and chloride ions were added to neutralize the system at a  
79 concentration of 0.15 M NaCl.

80 The simulations were performed using GROMACS 2019.4<sup>30</sup>. All systems were minimized  
81 until convergence or to a maximum of 5000 steps. The systems were then equilibrated in  
82 six steps totaling to 375 ps, using the standard method from the CHARMM-GUI. The first  
83 three equilibration runs used a time step of 1 fs while the last three and the production  
84 run used a time step of 2 fs. The first three equilibration runs were each 25 ps long and  
85 the final three were each 100 ps long. The position restraints were gradually lifted during  
86 the equilibration steps as suggested in the default CHARMM-GUI protocol. Periodic  
87 boundary conditions were applied. The Verlet cutoff scheme was used throughout with a  
88 force-switch modifier starting at 10 Å and a cutoff of 12 Å. A cutoff of 12 Å was used for  
89 short-range electrostatics and the particle mesh Ewald (PME) method was used for long-

90 range electrostatics<sup>35,36</sup>. A Berendsen thermostat was used for all steps of the  
91 equilibration and a Nose-Hoover thermostat<sup>37,38</sup> was utilized in the production run to  
92 maintain the temperature at 310.15 K for all steps. Using semi-isotropic pressure  
93 coupling, the pressure was maintained at 1 bar in the last four steps of equilibration and  
94 in the production run using the Berendsen barostat<sup>39</sup> and the Parrinello-Rahman  
95 barostat<sup>40</sup>, respectively. The LINCS algorithm was used to constrain covalent bonds to  
96 hydrogen atoms<sup>41</sup>. The production runs were 100 ns long with a total of three repeats for  
97 each system. Each repeat had different initial velocities.

98 The system for the Q277N mutant was prepared as above, with the exception that the  
99 Gln277 sidechain was manually mutated to Asn by prior to system setup. The same  
100 background protonation scheme was used, and additionally Glu412 and Glu417 were  
101 protonated. The system was simulated as described with three repeats of 100 ns each.

102 Potential hydrogen bonds between the residues Glu80, Gln277, Glu412, Leu414 and  
103 Glu417 were sampled every 10 ps. The donor atoms include: Q277NH1, Q277NH2,  
104 E80HE2 (if protonated), E412HE2 (if protonated), and E417HE2 (if protonated). The  
105 acceptor atoms include: Q277OE1, E80OE1, E80OE2, E412OE1, E412OE2, L414O,  
106 E417OE1 and E417OE2. The 4.3.1 Hydrogen Bond Analysis module<sup>42</sup> of MDAnalysis<sup>43,44</sup>  
107 was used for the analysis, employing an updated and adapted version of M. Chavent's  
108 Jupyter Notebook available on GitHub (<https://github.com/MChavent/Hbond-analysis>)<sup>45</sup>.

109 Default cutoffs were used for the donor-acceptor distance (3.0 Å) and the donor-  
110 hydrogen-acceptor angle (150°). The presence of each unique hydrogen bond was  
111 calculated over the trajectory and expressed as a percentage of the total trajectory; the  
112 presence of equivalent hydrogen bonds (e.g., from 417OE1 and 417OE2 in the

113 deprotonated state) were added to give one overall percentage for the given interaction.  
114 Plots were prepared using the Matplotlib package in Python. Figures were prepared using  
115 VMD<sup>46</sup>.

### 116 *Statistics and Data Analysis*

117 Current desensitization decays were fitted using exponential decay functions in Clampfit  
118 (Molecular Devices). The percent of steady-state current was the current at the end of a  
119 pH application which had reached equilibrium divided by the peak current. For recovery  
120 from desensitization experiments, the test peak (i.e., the second response) was  
121 normalized to the conditioning peak (i.e., the first response). OriginLab (OriginLab Corp)  
122 was used to fit the normalized responses to:

$$123 \quad I_t = \left(1 - e^{(-t/\tau)}\right)^m \quad \text{Eq. 1}$$

124 Where  $I_t$  is the fraction of the test peak at an interpulse interval of  $t$  compared to the  
125 conditioning peak,  $\tau$  is the time constant of recovery and  $m$  is the slope of the recovery  
126 curve. Each protocol was performed between 1 and 3 times on a single patch, with the  
127 resulting test peak/conditioning peak ratios averaged together. Patches were individually  
128 fit and averages for the fits were reported in the text. N was taken to be a single patch.  
129 For activation and steady-state desensitization curves (SSD), peak currents within a  
130 patch were normalized to the peak response evoked by pH 5.5 and fit to:

$$131 \quad I_x = \frac{1}{\left(1 + 10^{((pH_{50} - pH_x)n)}\right)} \quad \text{Eq. 2}$$

132 where  $I_x$  is the current at a given pH value  $X$ ,  $pH_{50}$  is the pH yielding half maximal response  
133 and  $n$  is the Hill slope. Patches were individually fit and averages for the fits were reported  
134 in the text. N was taken to be a single patch.

135 Unless otherwise noted, statistical testing was done using nonparametric permutation or  
136 randomization tests with at least 100,000 iterations implemented in Python to assess  
137 statistical significance. Statistical comparisons of recovery from desensitization were  
138 based and reported on differences in recovery time constant.

## 1 **Results**

2 Our goal was to investigate the functional properties of the Q276G mutation in a cASIC1  
3 background, to permit easy comparison with structural data and molecular dynamic  
4 simulations. HEK cells are an ideal system for this as they are easily cultured, transfected  
5 and amenable to patch clamp. However, HEK cells express endogenous human ASIC1  
6 which may complicate interpretation. Therefore, we removed the endogenous human  
7 ASIC1 using CRISPR. To do this, exon 2 of the human ASIC1 gene was targeted with a  
8 guide-RNA cloned into a Cas9-GFP expressing vector (see Methods). Single GFP-  
9 positive HEK cells were clonally expanded and screened using PCR followed by  
10 sequencing (Supplemental Figure 1A). One such clonal population was selected for  
11 further characterization. As seen in Supplemental Figure 1, this cell line had negligible  
12 ASIC1 immunoreactivity compared to either wild type HEK cells or HEK cells transfected  
13 with human ASIC1a. Furthermore, whole cell patch clamp recordings from these  
14 presumptive KO cells found no significant currents in response to pH 5 application. All  
15 other experiments in this study used this HEK ASIC1 KO cell line where endogenous  
16 ASIC1 has been removed.

17 To investigate the kinetic consequences of Q277G in cASIC1, we excised outside-  
18 out patches from HEK KO cells transfected with either wild type cASIC1 or cASIC1  
19 Q277G, along with eGFP. Patches were jumped from pH 8, to populate the resting state,  
20 into pH 6.5, 6 or 5.5, to activate and desensitize the channels. We were surprised to find  
21 that desensitization is completely intact in Q277G (Figure 1C). Indeed, the rate of  
22 desensitization was accelerated more than two-fold (Figure 1C). We also noted that there  
23 was a slight elevation of the steady-state or equilibrium current with pH 5.5 stimuli (Figure

24 1C and F, %steady-state current: wild type  $0.09 \pm 0.03\%$ ,  $n = 6$ ; Q277G  $2.0 \pm 0.6\%$ ,  $n =$   
25 7,  $p = 0.005$ ). To better compare with past work<sup>24</sup>, we used the same pH 6.5 stimulus.  
26 Interestingly, the elevated steady-state current was more prominent with less acidic  
27 stimuli, increasing to approximately 10% of the peak response using pH 6.5 (Figure 1D-  
28 F, %steady-state current: pH 6.0  $1.8 \pm 0.4\%$ , pH 6.5  $10 \pm 2\%$ ,  $n = 7$ ,  $p = 0.0001$ ). Such a  
29 pH-dependent increase in steady-state current was not detectable in wild type channels,  
30 although the amplitudes of these steady-state currents are exceedingly small and hence  
31 difficult to measure (Figure 1D, F, %steady-state current: pH 6.0  $0.15 \pm 0.09\%$ , pH 6.5  
32  $0.06 \pm 0.04\%$ ,  $n = 6$ ,  $p = 0.32$  versus pH 5.5 steady-state).

33 The robust desensitization of Q277G was unexpected given prior work. However,  
34 we did observe a small yet significant increase in the current at steady-state, particularly  
35 at more alkaline stimulating values (Figure 1E-F). We hypothesize that this phenotype  
36 arises from a weaker pH-dependence of recovery from desensitization. ASIC recovery  
37 from desensitization is strongly dependent on the pH between the conditioning and test  
38 stimuli. Relatively alkaline inter-stimuli pH values accelerate recovery while more acidic  
39 inter-stimuli pH values slow recovery<sup>23,47-49</sup>. If one extrapolates this trend, then at more  
40 acidic values (i.e., pH 5.5) recovery is very slow and transitions from the desensitized  
41 state to the open or resting states are very unfavorable. Consequently, there is minimal  
42 steady-state current. The elevated steady-state current of Q277G suggests that Q277G  
43 recovery may be faster than wild type and/or less influenced by inter-stimuli pH values.  
44 To test this, we examined Q277G recovery from desensitization using several inter-stimuli  
45 pH values in the same patch. Consistent with our hypothesis, Q277G recovery from  
46 desensitization is substantially faster than wild type cASIC1 (Figure 2). Specifically,

47 Q277G recovery had a time constant of  $2.03 \pm 0.05$  ms ( $n = 5$ ) at pH 8 which is roughly  
48 400 fold faster than wild type cASIC1 ( $840 \pm 90$  ms,  $n = 5$ ,  $p < 1e^{-5}$ )<sup>23</sup>. Furthermore, the  
49 recovery time constants remained very fast at pH 7.4 and 7.0 ( $\tau_{\text{rec}}(\text{pH } 7.4) = 4.7 \pm 0.2$  ms,  
50  $\tau_{\text{rec}}(\text{pH } 7.0) = 34 \pm 2$  ms,  $n = 5$ ). Thus, these data support the notion that the elevated  
51 steady-state current in Q277G arises from faster recovery from desensitization in general.

52 Since steady-state desensitization (SSD) at any given pH value reflects a balance  
53 between channels entering and exiting the desensitized state, we hypothesized that the  
54 four-hundred fold faster recovery from desensitization would lead to a notable right-shift  
55 in the SSD curve. To test this, we constructed both activation and inhibition curves of  
56 Q277G and wild type cASIC1 in excised patches (Figure 3). We found that the pH-  
57 dependence of activation of Q277G was slightly more alkaline compared to wild type (wild  
58 type  $\text{pH}_{50} = 6.51 \pm 0.01$ ,  $n = 5$ ; Q277G  $\text{pH}_{50} = 6.55 \pm 0.01$ ,  $n = 6$ ,  $p = 0.006$ , Figure 3).  
59 However, the steady-state desensitization of Q277G was considerably right-shifted  
60 (Figure 3B-D). Specifically, the  $\text{pH}_{50}$  of SSD shifted from  $7.30 \pm 0.01$  in wild type to  $6.70$   
61  $\pm 0.01$  in Q277G ( $n = 6$  for both,  $p < 1e^{-5}$ ). The magnitude of the right-shift was sufficiently  
62 large to induce overlap with the activation curve. This distinct ‘window current’ led to  
63 standing currents with ‘baseline’ pH values such as pH 6.8 or 6.4 (Figure 3B) and a  
64 pronounced ‘foot’ on the acidic side of the SSD curve (Figure 3C). Taken together, we  
65 have found that Q277G produces only a small reduction in desensitization (or enhanced  
66 steady-state current). Further, that Q277G dramatically accelerates recovery from  
67 desensitization and right-shifts SSD curves with minimal effect on activation curves. We  
68 hypothesize that the recovery and SSD phenotypes all result from reducing the stability  
69 of the desensitized state. It has previously been suggested that the conformation of

70 Gln276 (human ASIC numbering) controls the stability of the desensitized state by acting  
71 as a valve or steric barrier to regulate isomerization of the  $\beta$ 11-12 linker<sup>24</sup>. To gain insight  
72 into the structural mechanism, we turned to molecular dynamic simulations.

73         Examining the proposed desensitized state structure of cASIC1 suggested that the  
74 Gln277 sidechain might form a hydrogen bond to the backbone oxygen atom of Leu414  
75 when the linker is in the desensitized conformation (Figure 4A). Rather than acting as a  
76 valve, Gln277 could potentially stabilize the desensitized conformation through this  
77 hydrogen bond as we proposed from previous simulations<sup>23</sup>. Additionally, three acidic  
78 residues, Glu80 and Glu417 in the lower palm domain and Glu412 in the upper palm  
79 domain, are within potential hydrogen bond distance of Gln277, partly depending on the  
80 protonation states of the acidic residues. Thus, the structure suggests that Glu277 could  
81 play a role in a larger hydrogen bond network (Figure 4A). Because protonation states of  
82 the acidic side chains cannot be observed but must be inferred, we first tested the relative  
83 stability of the potential hydrogen bonds in the presence of different protonation states of  
84 Glu80, Glu412 and Glu417. Each residue can be protonated or not, giving rise to eight  
85 possible protonation combinations. Using the desensitized state structure (PDB: 4NYK)<sup>27</sup>  
86 as a starting point, we simulated each protonation scheme for three repeats of 100 ns  
87 each. To quantify the stability of potential hydrogen bond interactions between the  
88 residues of interest, we measured the fraction of time that each potential hydrogen bond  
89 was present over the course of the simulations. Potential hydrogen bond donors  
90 considered were the side chains of Glu80, Gln277, Glu412 and Glu417, while potential  
91 hydrogen bond acceptors were the same side chains along with the backbone oxygen  
92 atom of Leu414. An interaction was considered as a hydrogen bond when the donor-



93 acceptor distance was within 3.0 Å and the donor-hydrogen-acceptor angle greater than  
94 150°. The overall hydrogen bond analysis (Supplemental Figure 2) illustrated that no  
95 matter the protonation states, Gln277 very rarely acted as a hydrogen bond acceptor. On  
96 the contrary, Gln277 often participated as a hydrogen bond donor in fairly stable hydrogen  
97 bonds. Looking at all 72 chains analyzed (8 setups x 3 repeats x 3 chains), Gln277 formed  
98 hydrogen bonds of varying stability to Glu80 in 75% of the cases; to Glu412 in 25% of  
99 cases; to L414 in 90% of cases and to Glu417 in 35% of cases. Therefore, we deemed  
100 the hydrogen bonds to Glu80 and to Leu414 to be most important. These two hydrogen  
101 bonds showed the highest stability in the setup in which Glu412 and Glu417 were  
102 protonated while Glu80 was deprotonated (E80-/E412H/E417H in Supplemental Figure  
103 2). Thus, we chose this protonation setup to be the most stable for the desensitized state.  
104 Under these conditions, the side chain conformation of Gln277 was generally stable and  
105 positioned to hydrogen bond with the side chain of Glu80 and the backbone carbonyl  
106 oxygen of Leu414 (Figure 4B, Supplemental Movie 1). These interactions are noteworthy  
107 as mutations of either Glu80 or Leu414 can profoundly alter desensitization kinetics<sup>23,50-</sup>  
108 <sup>53</sup>. In particular, motion of Leu414 is a critical regulator of ASIC desensitization,  
109 underscoring the potential significance of these contacts. Figure 4 and Supplemental  
110 Figure 3 illustrates this analysis, showing that Q277 spends considerable time in putative  
111 hydrogen bond interactions with both Glu80 and Leu414. We hypothesized that such a  
112 network stabilizes the desensitized state with Gln277 acting as a critical hub. This role of  
113 Gln277 as an electrostatic hub is in contrast with the purely steric ‘valve’ model of Gln277  
114 proposed previously<sup>24</sup>. We reasoned that a Q277N mutation may delineate between  
115 these hypotheses. If the ‘steric’ hypothesis is true, then shortening the side chain (Q277N)

116 should produce minimal effect on desensitization kinetics. However, if the electrostatic  
117 hub model is more accurate, then the sub-optimal bonding distances of Q277N should  
118 result in much faster recovery from desensitization. To confirm that Q277N does  
119 attenuate hydrogen bond interactions, we repeated simulations using the Q277N  
120 mutation and observed that Q277N showed a greatly reduced capacity to participate in  
121 hydrogen bonds with Glu80 and Leu414 (Figure 4C-F, Supplemental Movie 2,  
122 Supplemental Figure 3). Therefore, we measured the recovery from desensitization of  
123 Q277N in excised patches. Consistent with the electrostatic hub hypothesis, Q277N  
124 recovers from desensitization much faster than wild type at all pH values tested.  
125 Specifically, at pH 8 the recovery time constant for Q277N is  $4.0 \pm 0.1$  ms ( $n = 7$ ,  $p < 1e^{-5}$   
126 <sup>5</sup> versus wild type, Figure 5). This is slowed to  $32 \pm 3$  ms and  $1500 \pm 150$  ms at pH 7.4  
127 and 7 ( $n = 6$  and  $5$ , respectively; Figure 5). Next, we eliminated any residual capacity of  
128 the 277 position to participate in hydrogen bonds by using the Q277L mutation, which has  
129 identical steric factors as Q277N but no capacity for electrostatic interactions with nearby  
130 side chains. Consistent with the electrostatic hub hypothesis, Q277L has comparable  
131 recovery kinetics to Q277N ( $\tau_{\text{rec}}(\text{pH } 8) = 3.5 \pm 0.1$  ms,  $\tau_{\text{rec}}(\text{pH } 7.4) = 39 \pm 2$  ms,  $\tau_{\text{rec}}(\text{pH } 7) =$   
132  $2400 \pm 90$  ms  $n = 5-7$ , Figure 5B-D). While these time constants are slower than Q277G,  
133 they are orders of magnitude faster than wild type, suggesting the essential feature of  
134 Gln277's function is as a hydrogen bond hub or coordinator and not a steric valve.

135         These data demonstrate that in cASIC1 Q277G does not block desensitization.  
136 Rather, Q277G induces a slight increase in steady-state current that is pH-dependent.  
137 Given this, we re-examined the Q276G mutation in human ASIC1a as was previously  
138 published, as well as mouse ASIC1a. In both cases, the Q276G mutation gave small,

139 barely detectable currents in excised patches, necessitating whole cell recording. In the  
140 case of mouse ASIC1a Q276G, even whole cell currents were too small to resolve and  
141 examine convincingly ( $43 \pm 13$  pA,  $n = 10$ ). Therefore, we confined ourselves to hASIC1a  
142 Q276G. As with cASIC1 Q277G, desensitization was intact in this mutant but, rather than  
143 accelerating current decay as in cASIC1, hASIC1a Q276G showed much slower decay  
144 kinetics with pH 5.5 evoked responses (Figure 6). Moreover, currents evoked by pH 6.5  
145 did not exhibit macroscopic desensitization on these time scales. Interestingly, we  
146 observed rather fast rundown or inhibition when using a 5 second stimulus and 20 second  
147 intervals (Figure 6A). This stimulus and interval duration has proven adequate for wild  
148 type hASIC1a in our hands. To properly measure the desensitization time course and  
149 allow for complete recovery, we progressively extended both the stimulus and interval  
150 times. Ultimately, using a 100 second pH application spaced by 120 seconds, we found  
151 that hASIC1a Q276G channels desensitize very strongly using pH 5.5 or less strongly  
152 when using pH 6.5 (Figure 6, steady-state current: pH 5.0  $3.7 \pm 0.5\%$  of peak; pH 6.5  $17$   
153  $\pm 2\%$  of peak,  $n = 5$ ). However, their desensitization time course is considerably longer  
154 than wild type (Q276G:  $8800 \pm 1400$  ms,  $n = 5$ ; wt:  $788 \pm 104$  ms,  $n = 5$ ,  $p < 1e^{-5}$ ). Taken  
155 together, we demonstrate that the Q/G mutation does not abolish desensitization as  
156 previously reported. Rather, in cASIC1 this mutation elevates the steady-state current,  
157 accelerates recovery from desensitization and reduces the stability of the desensitized  
158 state. Molecular dynamic simulations and subsequent mutagenesis suggest these  
159 phenotypes arise by destabilizing a critical hydrogen bond network, which in the wild type  
160 stabilizes the desensitized state. In hASIC1a, this mutation also does not abolish  
161 desensitization yet the functional phenotype is distinct from cASIC1.

## 1 **Discussion**

2 We explored the properties of the recently described Q276G ASIC1 mutation<sup>24</sup> (human  
3 numbering) using a combination of fast perfusion electrophysiology and molecular  
4 dynamics simulations. In contrast to prior work, we find that this mutation does not abolish  
5 ASIC1 desensitization. Rather, this mutation leads to a slight elevation in steady-state  
6 current that is more pronounced with weaker pH stimuli (Figure 1). In cASIC1, Q277G  
7 also markedly accelerates recovery from desensitization over a wide pH range (Figure 2)  
8 and right-shifts the pH-dependence of steady-state desensitization without substantially  
9 altering activation (Figure 3). All-atom simulations of the cASIC1 desensitized state  
10 indicate that this conformation is stabilized by a network of hydrogen bonds linking the  
11 lower palm residue Glu80, through Gln277, with the  $\beta$ 11-12 linker (Figure 5). Consistent  
12 with this, compromising the hydrogen bond network by shortening the Q277 side chain  
13 either slightly (Q277N) or significantly (Q277G) has a profound impact on the stability of  
14 the desensitized state as measured by recovery from desensitization (Figure 5). Finally,  
15 we found that hASIC1a Q276G also desensitizes but both enters and exits the  
16 desensitized state slower than wild type hASIC1a (Figure 6).

### 17 *Comparison with previous studies*

18 The original report that Q276G blocks desensitization used human ASIC1a in a *Xenopus*  
19 oocyte expression system primarily using bath perfusion, pH 6.5 as a stimulus with pH  
20 7.4 as a baseline pH<sup>24</sup>. Using pH 6.5 as a stimulus, combined with the phenotype of  
21 hASIC1a Q276G, may have led to the assertion that Q276G blocks desensitization.  
22 Specifically, the slow desensitization of hASIC1a Q276G and elevated steady-state  
23 current produced by pH 6.5 can lead to an observed lack of desensitization or current

24 decay during shorter agonist applications (Figure 6A). This problem may be exacerbated  
25 by the slow recovery of hASIC1a Q276G, particularly when using pH 7.4 as a baseline  
26 pH, thus leading to the suppression or lack of recovery of the peak while allowing the  
27 steady-state to persist. We suggest that this experimental setup, combined with the  
28 phenotype of hASIC1a Q276G, led to the conclusion that desensitization was abolished.

29         Rather than Gln277 controlling desensitization and recovery by the proposed valve  
30 mechanism<sup>24</sup>, we provide evidence that Gln277 is central to an important hydrogen bond  
31 network linking the influential Glu80 residue in the lower palm with the critical  $\beta$ 11-12  
32 linker that governs desensitization. How might such a network function in the ASIC gating  
33 cycle? In our simulations both Glu412 and Glu417 are protonated, leaving the Gln277  
34 amide to act as a hydrogen bond donor to the deprotonated Glu80 and the backbone  
35 carbonyl of Leu414. The interaction with the carbonyl is the most commonly observed  
36 (Figure 4, Supplemental Figures 2 and 3). We propose that in the desensitized state,  
37 Gln277 partly contributes to the stability of Leu414 by this hydrogen bond, with Gln277  
38 being held in this advantageous position by Glu80. Upon alkalization either Glu412,  
39 Glu417 or both tend to become deprotonated, acting as alternative hydrogen bond  
40 acceptors and thereby helping to pull the amide group of Q277 away from the backbone  
41 carbonyl of Leu414, releasing Leu414. This would facilitate recovery from desensitization.  
42 However, it is difficult to reconcile this hypothesis with the hASIC1a Q276G data which  
43 shows an apparent slowing of recovery from desensitization.

#### 44 *Human versus chicken data*

45 In our hands, the Q/G mutant gives opposite effects in cASIC1 versus hASIC1a,  
46 accelerating kinetics in the former but slowing them in the latter (Figure 1 versus Figure

47 6). This is reminiscent of the effects of psalmotoxin which inhibits mammalian ASICs by  
48 stabilizing a desensitized state<sup>54</sup> yet activates cASIC1, promoting an unusual non-  
49 selective open state<sup>55,56</sup>. Another recent example is the blunted effect of mambalgin in  
50 cASIC1 compared to hASIC1a, which can largely be reversed by several point  
51 mutations<sup>57</sup>. Presently it is unclear what the source of these differences is. Human and  
52 chicken ASIC1 contain 56 amino acid differences, 31 of which are in the extracellular  
53 domain. A number of these are concentrated in the wrist region, including a 2-amino acid  
54 insertion. Given the wrist region's involvement in gating<sup>58</sup>, it is possible that many species-  
55 specific differences arise from here. Further differences relevant for our kinetic  
56 experiments include the TRL versus SQL substitutions around amino acids 84 to 86<sup>59</sup> as  
57 well as Ser275Ala, Val368Leu and Ala413Val which are all relatively proximal to Gln277  
58 (chicken to human differences). We hypothesize one or more of these changes subtly  
59 alters the structure of hASIC1a, potentially imparting distinct pK<sub>a</sub> values on critical palm  
60 residues and thus changing the phenotype of Q276G. As more hASIC1a structures  
61 become available in distinct functional states<sup>57</sup>, we hope to explore the source of these  
62 differences and the conservation of mechanisms in more detail. A similar examination  
63 may uncover why the equivalent Q269G mutation in ASIC3 does appear to inhibit  
64 desensitization even with pH 5<sup>60</sup>. Regardless of phenotypic differences, our data clearly  
65 indicate that both cASIC1 and hASIC1a Q277G mutants desensitize to a large extent.  
66 Therefore, using these mutations to explore either biophysical mechanisms of  
67 desensitization, or its physiological consequences, may be problematic.

1 **Acknowledgements**

2 Funding for this work was provided by NIH T32GM068411-15 and Joan Wright Goodman  
3 Fellowship to M.L.R., NSF GRFP to T.C., NSERC Discovery Grant (RGPIN 2019-06864)  
4 and Canada Research Chairs grant (950-232154) to M.Mu and NIH R00NS094761,  
5 R35GM137951 and NARSAD Young Investigator Award to D.M.M. We thank Dr. Matthieu  
6 Chavent for initial discussions concerning the hydrogen bond analysis.

1 **Author contributions**

2 M.L.R., M.Mi., D.K., T.C. and D.M.M. conducted experiments and analyzed data.

3 M.L.R., M.Mi., M.Mu. and D.M.M. interpreted results and edited the manuscript.



## Figure Legends

**Figure 1. cASIC1 Q277G exhibits strong desensitization over several pH values. (A)** Structure of the cASIC1 resting state (PDB: 6VTL). Domains are identified by color in one subunit while the remaining two subunits are colored light or darker grey. **(B)** Close in view of the boxed region in **(A)** showing Q277 position in two subunits as well as functionally relevant amino acids. The ‘front’ subunit has been removed leaving only the colored and ‘rear’ subunits for clarity. **(C)** Peak normalized outside-out patch responses from cASIC1 wild type (*black trace*) or Q277G (*blue trace*) during a jump from pH 8 to pH 5.5. **(D & E)** Responses from single outside-out cASIC1 wild type **(D)** or Q277G **(E)** patches to the indicated pH stimuli. **(F)** Summary of the percent steady-state current, normalized to the peak response within a pH, over several patches. Circles denote individual patches and error bars show S.E.M.

**Figure 2. Q277G rapidly recovers from desensitization over a wide pH range. (A)** Outside-out patch recordings of cASIC1 Q277G recovery from desensitization with interpulse pH values of 8.0, 7.4 and 7.0 (*upper, middle and lower traces, respectively*). All data from the same patch. Note the break and change in time base between conditioning and test pulses. **(B, C)** Summary recovery curves **(B)** and time constants **(C)** for Q277G recovery at different interpulse pH values. All pH values tested in the same patch. Symbols denote individual patches and error bars show S.E.M. Dotted line is the recovery time course of wild type cASIC1 with pH 8 drawn from Rook et al., 2020a.

**Figure 3. Q277G right-shifts steady-state desensitization without altering activation. (A)** Outside-out patch recording of cASIC1 Q277G responses to increasingly acidic solutions. Darker solutions are more basic while acidic solutions are more blue. **(B)** Responses of Q277G to pH 5.5 application when preincubated with solutions ranging from pH 8 to 6. Note that solutions of intermediate acidity (pH 6.8-6.4) produces persistent currents at equilibrium. **(C)** Response curves to activation (*solid triangles*) or steady-state desensitization (*open circles*) for wild type (*black*) or Q277G (*blue*). **(D)** Mean  $\pm$  SEM pH<sub>50s</sub> of activation (*left*) and steady-state desensitization (*right*) for wild type (*black*) or Q277G (*blue*). Fits from individual patches are shown as symbols following the legend **(C)**.

**Figure 4. Gln277 links Leu414 and Glu80 via hydrogen bond network. (A)** A single subunit of cASIC1 in the desensitized state, illustrating residues within potential hydrogen bonding distance of Gln277 (*inset*). Colors as in Figure 1A. **(B)** Snapshot from a WT simulation illustrating the hydrogen bond network with Gln277 in the center, hydrogen bonding to L414 and E80. The snapshot was taken at 8.6 ns. **(C)** Hydrogen bond analysis for a representative repeat (100 ns) of wild type with E80 deprotonated and E412 and E417 protonated. All hydrogen bonds formed between donors and acceptors of the sidechains of E80, Q277, E412 and E417 are considered, as well as hydrogen bonds in which the backbone oxygen atom of L414 participates as an acceptor. Acceptors are listed horizontally, donors vertically. The colored squares illustrate that a given hydrogen bond is present for part of the 100 ns of simulation, following the color bar given to the right. Hydrogen bonds in which Q277 participates as a donor are highlighted by black boxes. **(D)** Snapshot from a Q277N simulation illustrating that the inserted Asn residue is too short to form the same hydrogen bond network as Gln277. The snapshot was taken at 19.2 ns. **(E)** Hydrogen bond analysis as **D**, but for the Q277N mutant. **(F)** Average stability (*bars*) of the E80-Q277 and the L414-Q277 hydrogen bonds in the wild type (*black*) and Q277N simulations (*green*) (WT: E80-Q277: 38 +/- 9%; L414-Q277: 41 +/- 7%; Q277N: E80-N277: 0.02 +/- 0.01%; L414-N277: 1.6 +/- 0.6%). The nine data points (3 chains x 3 repeats) are illustrated as points and the error bar depict standard deviation.

**Figure 5. Q277N recovers nearly as fast as Q277G. (A)** Outside-out patch recordings of cASIC1 Q277N recovery from desensitization with interpulse pH values of 8.0, 7.4 and 7.0 (*upper, middle and lower traces, respectively*). All data from the same patch. Note the break and change in time base between conditioning and test pulses. **(B)** Summary recovery curves (*left*) and time constants (*right*) for Q277N recovery at different interpulse pH values. All pH's tested in the same patch. Symbols denote individual patches and error bars show S.E.M. **(C)** Summary of recovery time constants at various pH values for wild type, Q277G and Q277N. Wild type data drawn from Rook et al., 2020a.

**Figure 6. Human ASIC1a Q276G also does not abolish desensitization. (A)** Whole cell recording of hASIC1a Q276G during repeated applications of pH 5.5 (*blue trace*) or 6.5 (*light blue trace*). **(B)** Q276G (*left, blue traces*) and wild type (*right, black traces*)

responses to longer pH 5.5 and 6.5 applications with greater intervals. **(C)** Summary of desensitization time constants (*left*) and percent of steady-state current (*right*) at pH 5.5 (*circles*) and 6.5 (*triangles*) for wild type (*black*) and Q277G (*blue*). Symbols denote single cells and error bars are SEM.

**Supplemental Figure 1. Validation of human ASIC1 knockout cells.** **(A)** Sequencing of genomic DNA from HEK wild type cells (WT) or ASIC1 knockout cells (KO) of human ASIC1 gene's second exon. Positions highlighted in yellow show that all alleles of the knockout line have been frame shifted. **(B)** Western blot of wild type HEK293 cells (WT), ASIC1 knockout cells (KO) and KO cells overexpressing human ASIC1a (OE). **(C)** pH-5 evoked whole cell current densities from HEK wild type (*black*) and KO (*grey*) cells. Raw traces are inset. pH 5-evoked peak current density: wild type  $20 \pm 3$  pA/pF,  $n = 20$  cells; KO pH 5  $0.51 \pm 0.05$  pA/pF,  $n = 20$  cells;  $p < 1e^{-5}$ , Mann-Whitney U test. Circles represent individual cells and error bars depict S.E.M.

**Supplemental Figure 2. Hydrogen bond analysis for all eight possible protonation setups concerning E80 (H/-), E412 (H/-) and E417 (H/-).** All hydrogen bonds formed between donors and acceptors of the sidechains of E80, Q277, E412 and E417 are considered, as well as hydrogen bonds in which the backbone oxygen atom of L414 participates as an acceptor. Hydrogen bond stability, following the color scale, is illustrated for each chain in each of three runs (100 ns in duration). Hydrogen bonds in which Q277 participates as a donor are highlighted by black boxes.

**Supplemental Figure 3. Q277N reduces hydrogen bond stability.** Same analysis as Supplemental Figure 2. Hydrogen bond stability for each chain in each of three runs (100 ns in duration). Note that Q277N shows less stability than wild type of each chain and each run.

## Figures and Legends

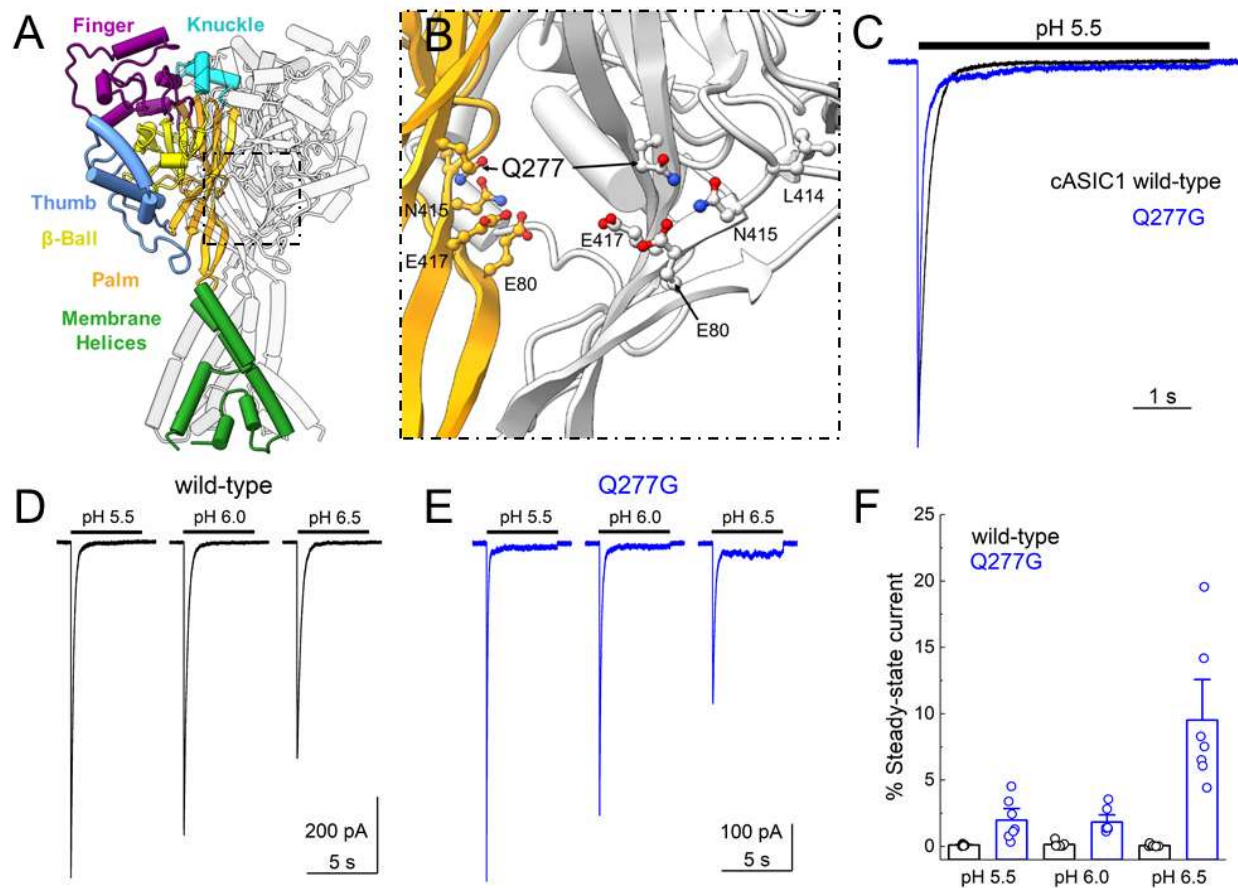

**Figure 1. cASIC1 Q277G exhibits strong desensitization over several pH values. (A)** Structure of the cASIC1 resting state (PDB: 6VTL). Domains are identified by color in one subunit while the remaining two subunits are colored light or darker grey. **(B)** Close in view of the boxed region in **(A)** showing Q277 position in two subunits as well as functionally relevant amino acids. The ‘front’ subunit has been removed leaving only the colored and ‘rear’ subunits for clarity. **(C)** Peak normalized outside-out patch responses from cASIC1 wild type (*black trace*) or Q277G (*blue trace*) during a jump from pH 8 to pH 5.5. **(D & E)** Responses from single outside-out cASIC1 wild type **(D)** or Q277G **(E)** patches to the indicated pH stimuli. **(F)** Summary of the percent steady-state current, normalized to the peak response within a pH, over several patches. Circles denote individual patches and error bars show S.E.M.

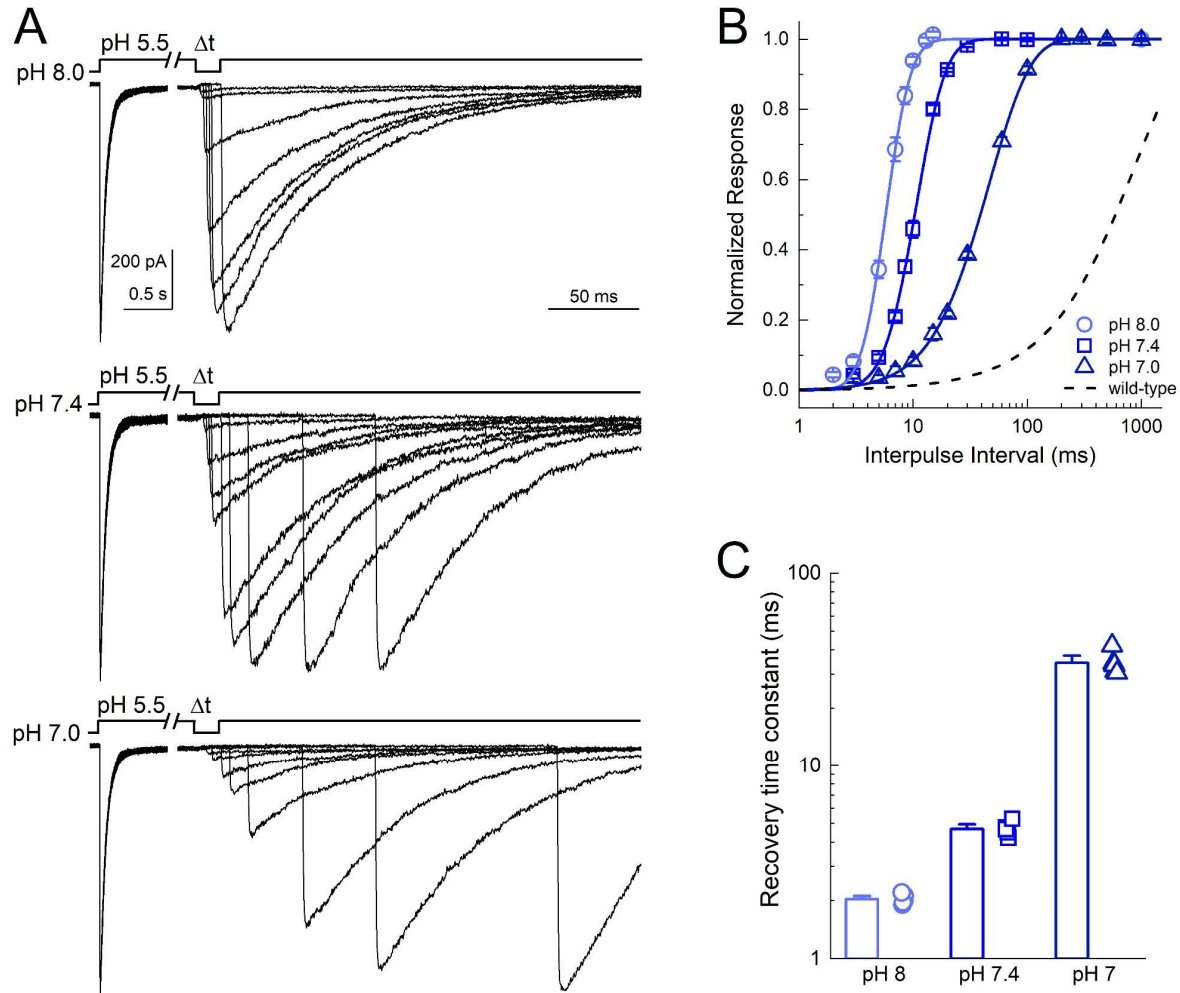

**Figure 2. Q277G rapidly recovers from desensitization over a wide pH range. (A)** Outside-out patch recordings of cASIC1 Q277G recovery from desensitization with interpulse pH values of 8.0, 7.4 and 7.0 (*upper, middle and lower traces, respectively*). All data from the same patch. Note the break and change in time base between conditioning and test pulses. **(B, C)** Summary recovery curves **(B)** and time constants **(C)** for Q277G recovery at different interpulse pH values. All pH values tested in the same patch. Symbols denote individual patches and error bars show S.E.M. Dotted line is the recovery time course of wild type cASIC1 with pH 8 drawn from Rook et al., 2020a.

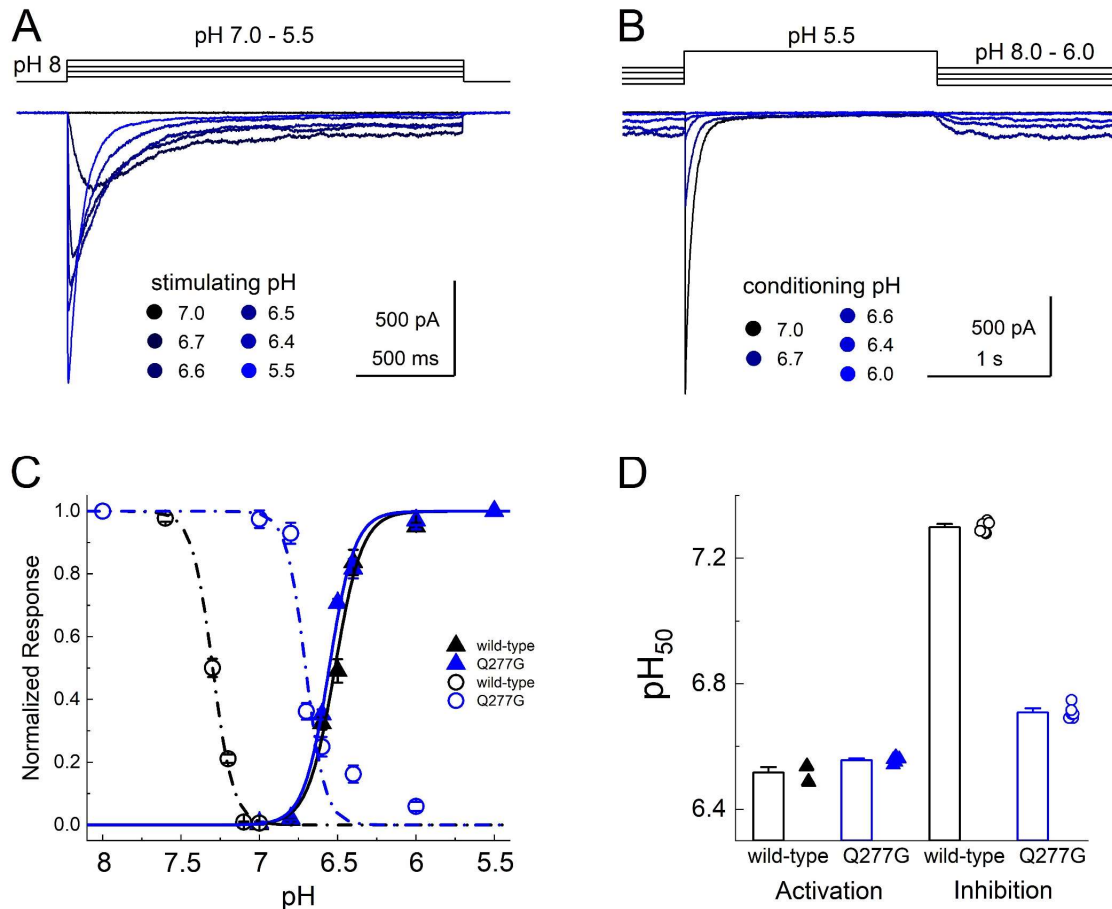

**Figure 3. Q277G right-shifts steady-state desensitization without altering activation.** (A) Outside-out patch recording of cASIC1 Q277G responses to increasingly acidic solutions. (B) Responses of Q277G to pH 5.5 application when preincubated with solutions ranging from pH 8 to 6. Note solutions of intermediate acidity (pH 6.8-6.4) produces persistent currents at equilibrium. (C) Response curves to activation (*solid triangles*) or steady-state desensitization (*open circles*) for wild type (*black*) or Q277G (*blue*). (D) Mean  $\pm$  SEM pH<sub>50</sub>s of activation (*left*) and steady-state desensitization (*right*) for wild type (*black*) or Q277G (*blue*). Fits from individual patches are shown as symbols following the legend (C).



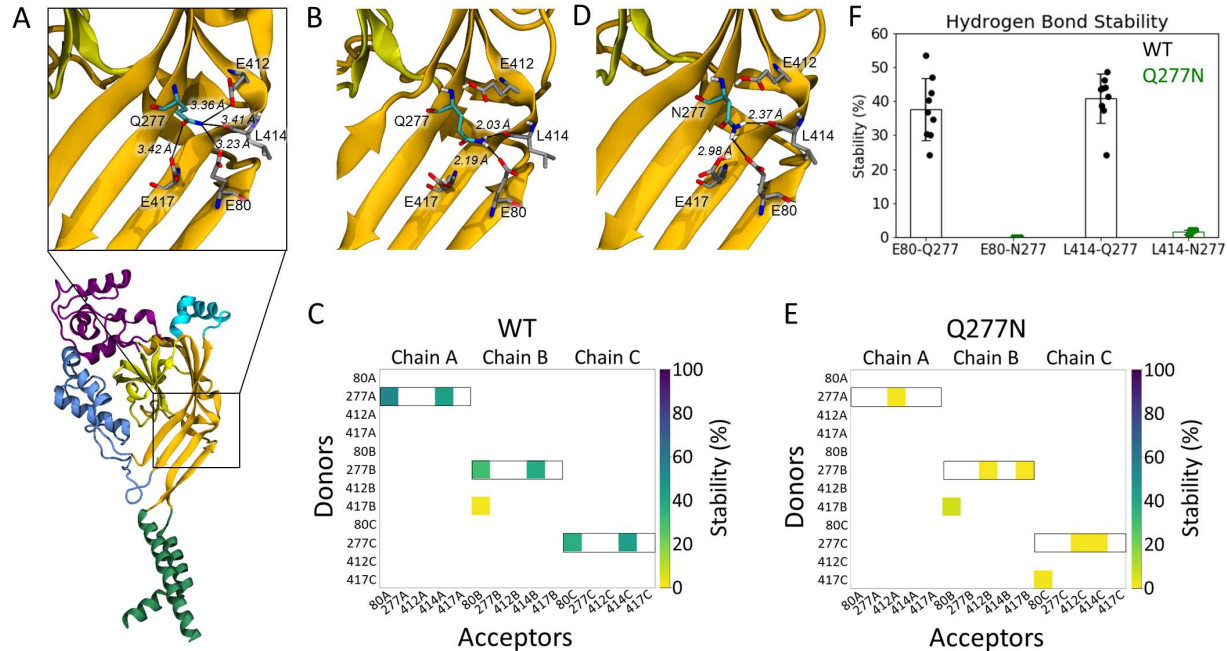

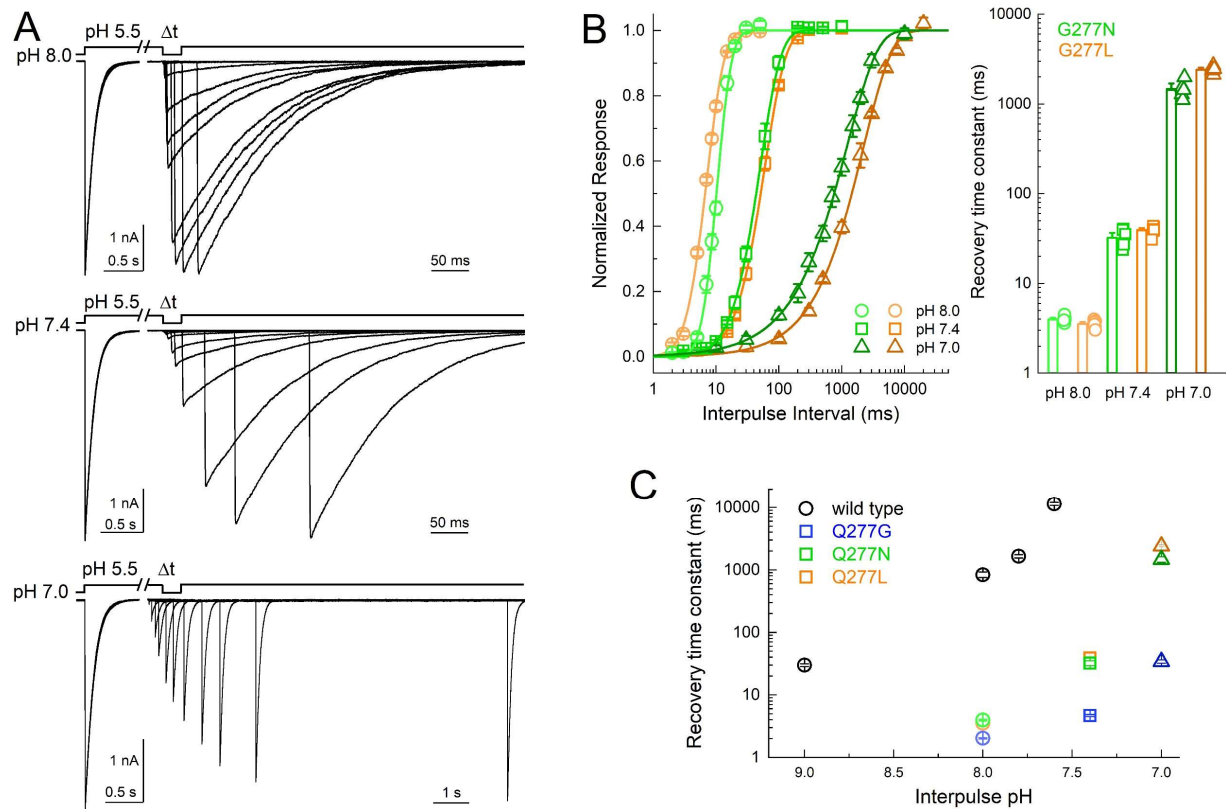

**Figure 5. Q277N recovers nearly as fast as Q277G. (A)** Outside-out patch recordings of cASIC1 Q277N recovery from desensitization with interpulse pH values of 8.0, 7.4 and 7.0 (*upper, middle and lower traces, respectively*). All data from the same patch. Note the break and change in time base between conditioning and test pulses. **(B)** Summary recovery curves (*left*) and time constants (*right*) for Q277N and Q277L recovery at different interpulse pH values. All pH values tested in the same patch. Symbols denote individual patches and error bars show S.E.M. **(C)** Summary of recovery time constants at various pH values for wild type, Q277G, Q277N, and Q277L. Wild type data drawn from Rook et al., 2020a.



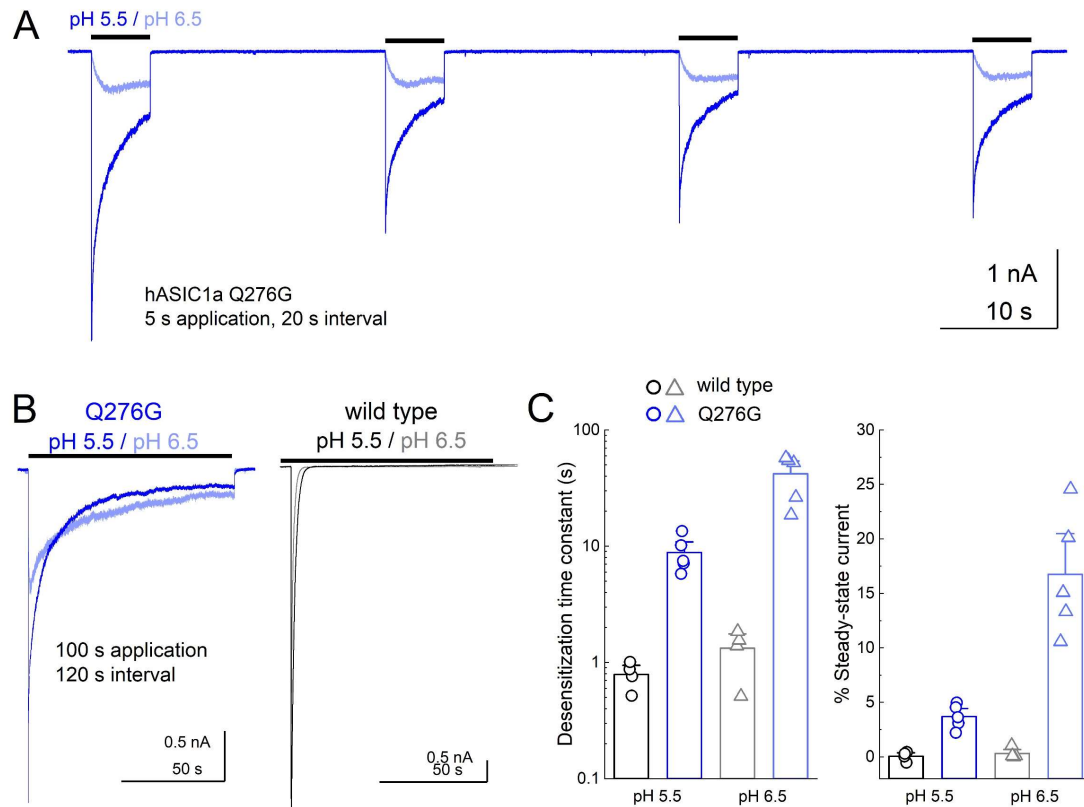

**Figure 6. Human ASIC1a Q276G also does not abolish desensitization. (A)** Whole cell recording of hASIC1a Q276G during repeated applications of pH 5.5 (*blue trace*) or 6.5 (*light blue trace*). **(B)** Q276G (*left, blue traces*) and wild type (*right, black traces*) responses to longer pH 5.5 and 6.5 applications with greater intervals. **(C)** Summary of desensitization time constants (*left*) and percent of steady-state current (*right*) at pH 5.5 (*circles*) and 6.5 (*triangles*) for wild type (*black*) and Q276G (*blue*). Symbols denote single cells and error bars are SEM.

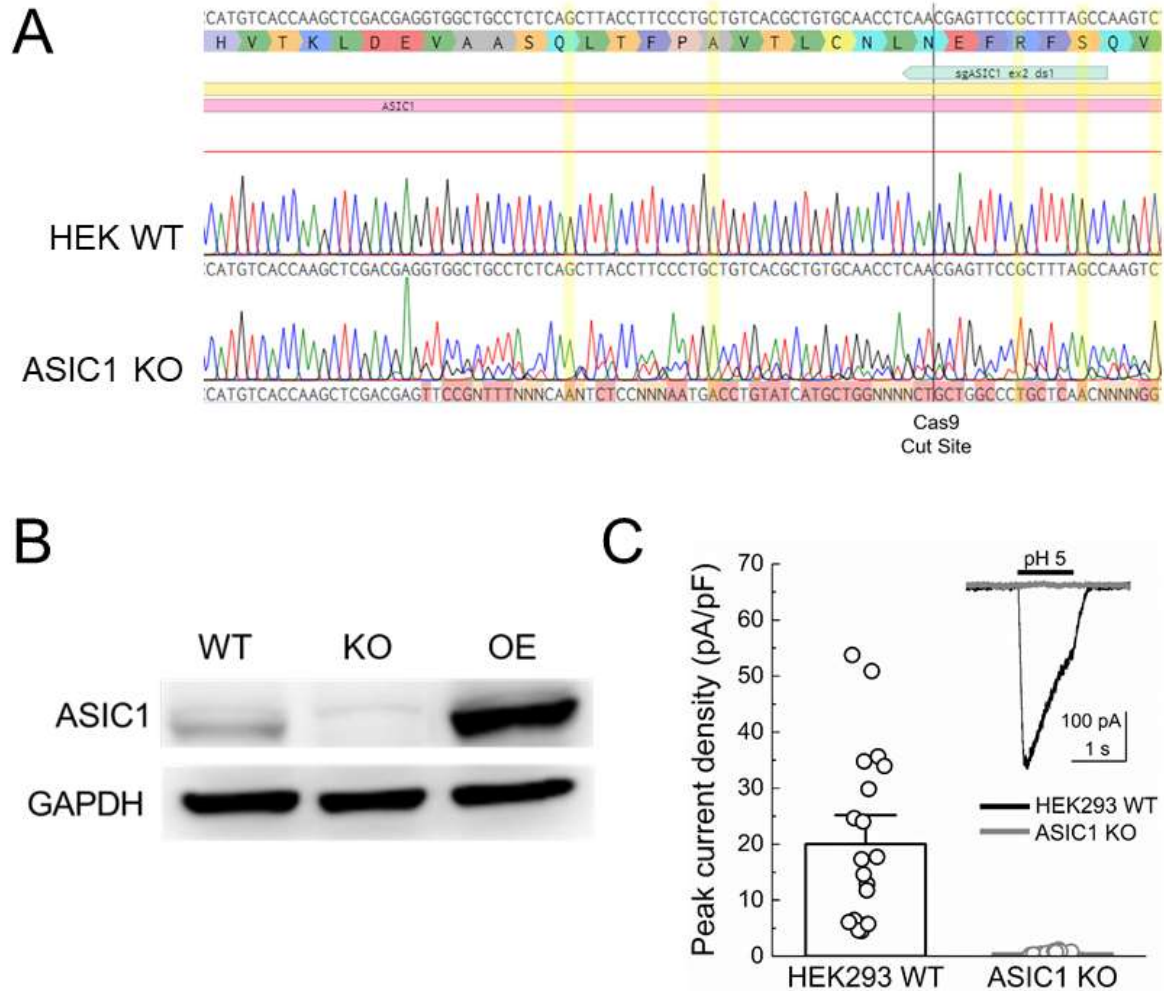

**Supplemental Figure 1. Validation of human ASIC1 knockout cells.** (A) Sequencing of genomic DNA from HEK wild type cells (WT) or ASIC1 knockout cells (KO) of human ASIC1 gene's second exon. Positions highlighted in yellow show that all alleles of the knockout line have been frame shifted. (B) Western blot of wild type HEK293 cells (WT), ASIC1 knockout cells (KO) and KO cells overexpressing human ASIC1a (OE). (C) pH-5 evoked whole cell current densities from HEK wild type (*black*) and KO (*grey*) cells. Raw traces are inset. pH 5-evoked peak current density: wild type  $20 \pm 3$  pA/pF,  $n = 20$  cells; KO pH 5  $0.51 \pm 0.05$  pA/pF,  $n = 20$  cells;  $p < 1e^{-5}$ , Mann-Whitney U test. Circles represent individual cells and error bars depict S.E.M.

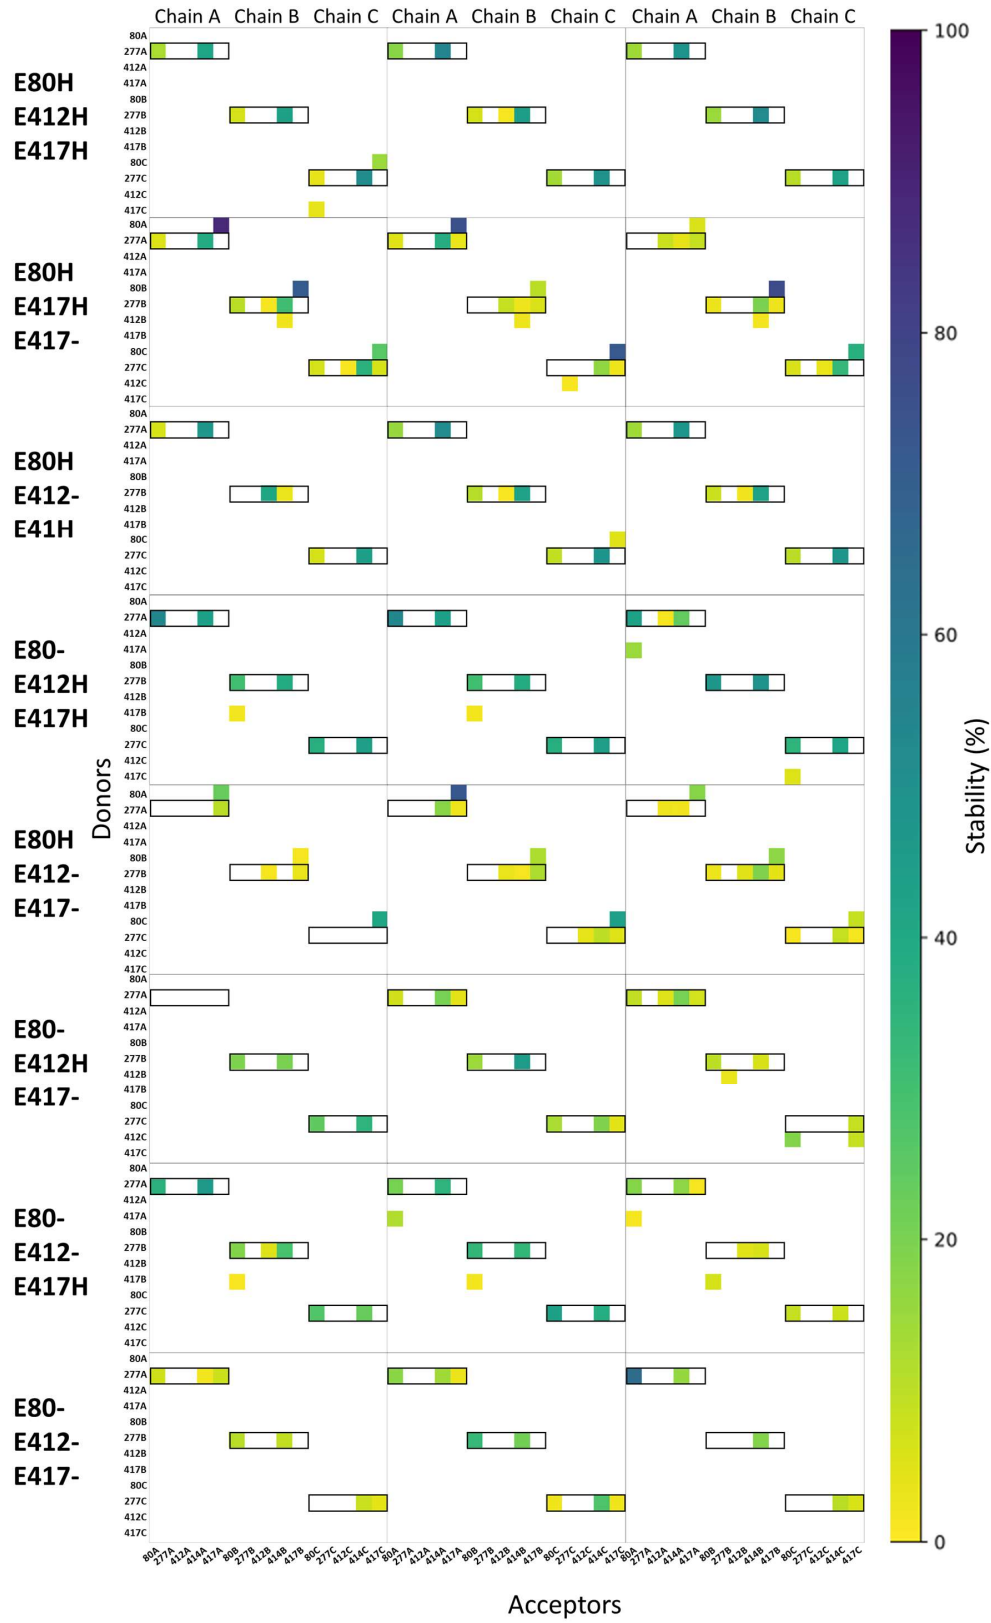

**Supplemental Figure 2. Hydrogen bond analysis for all eight possible protonation setups concerning E80 (H/-), E412 (H/-) and E417 (H/-).** All hydrogen bonds formed between donors and acceptors of the sidechains of E80, Q277, E412 and E417 are considered, as well as hydrogen bonds in which the backbone oxygen atom of L414 participates as an acceptor. Hydrogen bond stability, following the color scale, is illustrated for each chain in each of three runs (100 ns in duration). Hydrogen bonds in which Q277 participates as a donor are highlighted by black boxes.

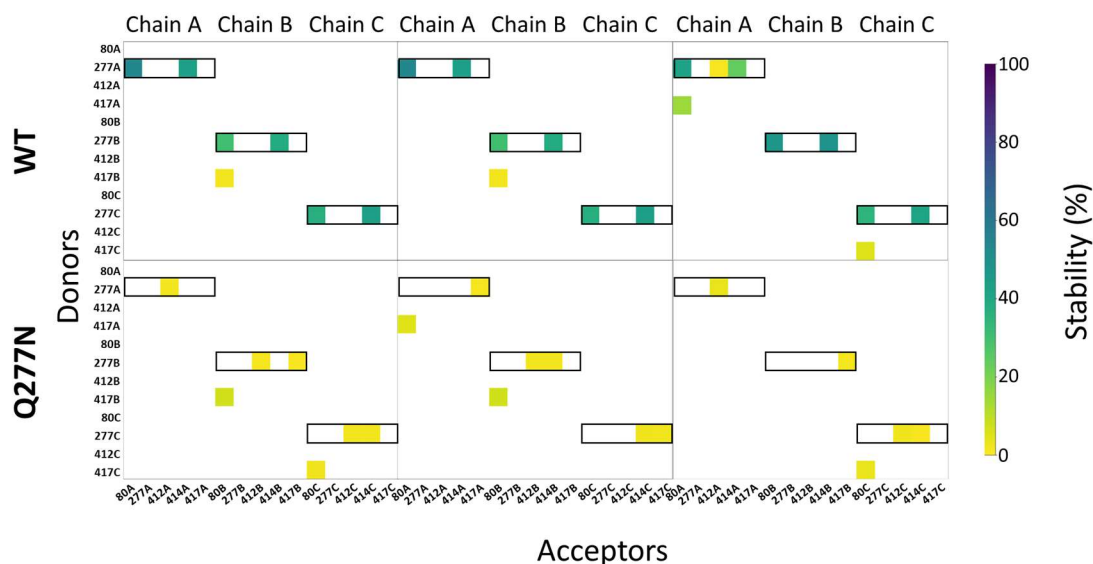

**Supplemental Figure 3. Q277N reduces hydrogen bond stability.** Same analysis as Supplemental Figure 2. Hydrogen bond stability for each chain in each of three runs (100 ns in duration). Note that Q277N shows less stability than wild type of each chain and each run.

## References

- 1 Katz, B. & Thesleff, S. A study of the desensitization produced by acetylcholine at the motor end-plate. *J Physiol* **138**, 63-80, doi:10.1113/jphysiol.1957.sp005838 (1957).
- 2 Papke, D., Gonzalez-Gutierrez, G. & Grosman, C. Desensitization of neurotransmitter-gated ion channels during high-frequency stimulation: a comparative study of Cys-loop, AMPA and purinergic receptors. *J Physiol* **589**, 1571-1585, doi:10.1113/jphysiol.2010.203315 (2011).
- 3 Jones, M. V. & Westbrook, G. L. Desensitized states prolong GABAA channel responses to brief agonist pulses. *Neuron* **15**, 181-191 (1995).
- 4 Gielen, M., Barilone, N. & Corringer, P. J. The desensitization pathway of GABAA receptors, one subunit at a time. *Nature communications* **11**, 5369, doi:10.1038/s41467-020-19218-6 (2020).
- 5 Stern-Bach, Y., Russo, S., Neuman, M. & Rosenmund, C. A point mutation in the glutamate binding site blocks desensitization of AMPA receptors. *Neuron* **21**, 907-918, doi:10.1016/s0896-6273(00)80605-4 (1998).
- 6 Nayeem, N., Zhang, Y., Schweppe, D. K., Madden, D. R. & Green, T. A nondesensitizing kainate receptor point mutant. *Molecular pharmacology* **76**, 534-542, doi:10.1124/mol.109.056598 (2009).
- 7 Gielen, M., Thomas, P. & Smart, T. G. The desensitization gate of inhibitory Cys-loop receptors. *Nature communications* **6**, 6829, doi:10.1038/ncomms7829 (2015).
- 8 Revah, F. *et al.* Mutations in the channel domain alter desensitization of a neuronal nicotinic receptor. *Nature* **353**, 846-849, doi:10.1038/353846a0 (1991).
- 9 Bertrand, D. *et al.* Unconventional pharmacology of a neuronal nicotinic receptor mutated in the channel domain. *Proc Natl Acad Sci U S A* **89**, 1261-1265, doi:10.1073/pnas.89.4.1261 (1992).
- 10 Gielen, M. & Corringer, P. J. The dual-gate model for pentameric ligand-gated ion channels activation and desensitization. *J Physiol* **596**, 1873-1902, doi:10.1113/JP275100 (2018).
- 11 Daniels, B. A., Andrews, E. D., Aourousseau, M. R., Accardi, M. V. & Bowie, D. Crosslinking the ligand-binding domain dimer interface locks kainate receptors out of the main open state. *J Physiol* **591**, 3873-3885, doi:10.1113/jphysiol.2013.253666 (2013).
- 12 Christie, L. A. *et al.* AMPA receptor desensitization mutation results in severe developmental phenotypes and early postnatal lethality. *Proc Natl Acad Sci U S A* **107**, 9412-9417, doi:10.1073/pnas.0908206107 (2010).
- 13 Kellenberger, S. & Schild, L. International union of basic and clinical pharmacology. XCI. structure, function, and pharmacology of acid-sensing ion channels and the epithelial Na<sup>+</sup> channel. *Pharmacological reviews* **67**, 1-35, doi:10.1124/pr.114.009225 (2015).
- 14 Wemmie, J. A., Taugher, R. J. & Kreple, C. J. Acid-sensing ion channels in pain and disease. *Nat Rev Neurosci* **14**, 461-471, doi:10.1038/nrn3529 (2013).
- 15 Zhu, S. *et al.* ASIC1 and ASIC3 contribute to acidity-induced EMT of pancreatic cancer through activating Ca(2+)/RhoA pathway. *Cell Death Dis* **8**, e2806, doi:10.1038/cddis.2017.189 (2017).
- 16 Sluka, K. A. & Gregory, N. S. The dichotomized role for acid sensing ion channels in musculoskeletal pain and inflammation. *Neuropharmacology*, doi:10.1016/j.neuropharm.2014.12.013 (2015).
- 17 Rook, M. L., Musgaard, M. & MacLean, D. M. Coupling structure with function in acid-sensing ion channels: challenges in pursuit of proton sensors. *J Physiol*, doi:10.1113/JP278707 (2020).
- 18 Yoder, N. & Gouaux, E. The His-Gly motif of acid-sensing ion channels resides in a reentrant 'loop' implicated in gating and ion selectivity. *Elife* **9**, doi:10.7554/eLife.56527 (2020).
- 19 Jasti, J., Furukawa, H., Gonzales, E. B. & Gouaux, E. Structure of acid-sensing ion channel 1 at 1.9 Å resolution and low pH. *Nature* **449**, 316-323, doi:10.1038/nature06163 (2007).

- 20 Vullo, S. *et al.* Conformational dynamics and role of the acidic pocket in ASIC pH-dependent gating. *Proc Natl Acad Sci U S A* **114**, 3768-3773, doi:10.1073/pnas.1620560114 (2017).
- 21 Krauson, A. J., Rued, A. C. & Carattino, M. D. Independent contribution of extracellular proton binding sites to ASIC1a activation. *J Biol Chem* **288**, 34375-34383, doi:10.1074/jbc.M113.504324 (2013).
- 22 Yoder, N., Yoshioka, C. & Gouaux, E. Gating mechanisms of acid-sensing ion channels. *Nature* **555**, 397, doi:10.1038/nature25782 (2018).
- 23 Rook, M. L., Williamson, A., Lueck, J. D., Musgaard, M. & Maclean, D. M. beta11-12 linker isomerization governs Acid-sensing ion channel desensitization and recovery. *Elife* **9**, doi:10.7554/eLife.51111 (2020).
- 24 Wu, Y., Chen, Z. & Canessa, C. M. A valve-like mechanism controls desensitization of functional mammalian isoforms of acid-sensing ion channels. *eLife* **8**, e45851, doi:10.7554/eLife.45851 (2019).
- 25 Ran, F. A. *et al.* Genome engineering using the CRISPR-Cas9 system. *Nat Protoc* **8**, 2281-2308, doi:10.1038/nprot.2013.143 (2013).
- 26 MacLean, D. M. in *Ionotropic Glutamate Receptor Technologies* (ed G. K. Popescu) Ch. 12, 165-183 (Springer, 2015).
- 27 Gonzales, E. B., Kawate, T. & Gouaux, E. Pore architecture and ion sites in acid-sensing ion channels and P2X receptors. *Nature* **460**, 599, doi:10.1038/nature08218 (2009).
- 28 Sali, A. & Blundell, T. L. Comparative protein modelling by satisfaction of spatial restraints. *J Mol Biol* **234**, 779-815, doi:10.1006/jmbi.1993.1626 (1993).
- 29 Lomize, M. A., Pogozheva, I. D., Joo, H., Mosberg, H. I. & Lomize, A. L. OPM database and PPM web server: resources for positioning of proteins in membranes. *Nucleic Acids Res* **40**, D370-376, doi:10.1093/nar/gkr703 (2012).
- 30 Abraham, M. J. *et al.* GROMACS: High performance molecular simulations through multi-level parallelism from laptops to supercomputers. *SoftwareX* **1-2**, 19-25 (2015).
- 31 Huang, J. *et al.* CHARMM36m: an improved force field for folded and intrinsically disordered proteins. *Nature methods* **14**, 71-73, doi:10.1038/nmeth.4067 (2017).
- 32 Jo, S., Kim, T., Iyer, V. G. & Im, W. CHARMM-GUI: a web-based graphical user interface for CHARMM. *J Comput Chem* **29**, 1859-1865, doi:10.1002/jcc.20945 (2008).
- 33 Kandt, C., Ash, W. L. & Tieleman, D. P. Setting up and running molecular dynamics simulations of membrane proteins. *Methods* **41**, 475-488, doi:10.1016/j.ymeth.2006.08.006 (2007).
- 34 Jorgensen, W. L., Chandrasekhar, J., Madura, J. D., Impey, R. W. & Klein, M. L. Comparison of Simple Potential Functions for Simulating Liquid Water. *J Chem Phys* **79**, 926-935, doi:10.1063/1.445869 (1983).
- 35 Darden, T., York, D. & Pedersen, L. Particle mesh Ewald: An N log(N) method for Ewald sums in large systems *J Chem Phys* **98**, 10089-10082 (1993).
- 36 Essmann, U. *et al.* A Smooth Particle Mesh Ewald Method. *J Chem Phys* **103**, 8577-8593, doi:10.1063/1.470117 (1995).
- 37 Hoover, W. G. Canonical Dynamics - Equilibrium Phase-Space Distributions. *Phys Rev A* **31**, 1695-1697, doi:10.1103/PhysRevA.31.1695 (1985).
- 38 Nose, S. A Molecular-Dynamics Method for Simulations in the Canonical Ensemble. *Mol Phys* **52**, 255-268, doi:10.1080/00268978400101201 (1984).
- 39 Berendsen, H. J. C., Postma, J. P. M., Vangunsteren, W. F., Dinola, A. & Haak, J. R. Molecular-Dynamics with Coupling to an External Bath. *J Chem Phys* **81**, 3684-3690, doi:10.1063/1.448118 (1984).
- 40 Parrinello, M. & Rahman, A. Polymorphic Transitions in Single-Crystals - a New Molecular-Dynamics Method. *J Appl Phys* **52**, 7182-7190, doi:10.1063/1.328693 (1981).



- 41 Hess, B. P-LINCS: A parallel linear constraint solver for molecular simulation. *Journal of Chemical Theory and Computation* **4**, 116-122, doi:10.1021/ct700200b (2008).
- 42 Smith, P., Ziolek, R. M., Gazzarrini, E., Owen, D. M. & Lorenz, C. D. On the interaction of hyaluronic acid with synovial fluid lipid membranes. *Phys Chem Chem Phys* **21**, 9845-9857, doi:10.1039/c9cp01532a (2019).
- 43 Michaud-Agrawal, N., Denning, E. J., Woolf, T. B. & Beckstein, O. MDAAnalysis: a toolkit for the analysis of molecular dynamics simulations. *J Comput Chem* **32**, 2319-2327, doi:10.1002/jcc.21787 (2011).
- 44 Gowers, R. J. *et al.* MDAAnalysis: A Python Package for the Rapid Analysis of Molecular Dynamics Simulations. *Proceedings of the 15th Python in Science Conference*, 98-105, doi:10.25080/majora-629e541a-00e (2016).
- 45 Del Toro, D. *et al.* Structural Basis of Teneurin-Latrophilin Interaction in Repulsive Guidance of Migrating Neurons. *Cell* **180**, 323-339 e319, doi:10.1016/j.cell.2019.12.014 (2020).
- 46 Humphrey, W., Dalke, A. & Schulten, K. VMD: Visual molecular dynamics. *J Mol Graph Model* **14**, 33-38, doi:10.1016/0263-7855(96)00018-5 (1996).
- 47 MacLean, D. M. & Jayaraman, V. Acid-sensing ion channels are tuned to follow high-frequency stimuli. *J Physiol* **594**, 2629-2645, doi:10.1113/JP271915 (2016).
- 48 Gwiazda, K., Bonifacio, G., Vullo, S. & Kellenberger, S. Extracellular Subunit Interactions Control Transitions between Functional States of Acid-sensing Ion Channel 1a. *J Biol Chem* **290**, 17956-17966, doi:10.1074/jbc.M115.641688 (2015).
- 49 Alijevic, O. *et al.* Slowing of the Time Course of Acidification Decreases the Acid-Sensing Ion Channel 1a Current Amplitude and Modulates Action Potential Firing in Neurons. *Frontiers in cellular neuroscience* **14**, 41, doi:10.3389/fncel.2020.00041 (2020).
- 50 Cushman, K. A., Marsh-Haffner, J., Adelman, J. P. & McCleskey, E. W. A conformation change in the extracellular domain that accompanies desensitization of acid-sensing ion channel (ASIC) 3. *The Journal of general physiology* **129**, 345-350, doi:10.1085/jgp.200709757 (2007).
- 51 Della Vecchia, M. C., Rued, A. C. & Carattino, M. D. Gating transitions in the palm domain of ASIC1a. *J Biol Chem* **288**, 5487-5495, doi:10.1074/jbc.M112.441964 (2013).
- 52 MacLean, D. M. & Jayaraman, V. Deactivation kinetics of acid-sensing ion channel 1a are strongly pH-sensitive. *Proceedings of the National Academy of Sciences* **114**, E2504-E2513, doi:10.1073/pnas.1620508114 (2017).
- 53 Roy, S. *et al.* Molecular determinants of desensitization in an ENaC/degenerin channel. *FASEB journal : official publication of the Federation of American Societies for Experimental Biology* **27**, 5034-5045, doi:10.1096/fj.13-230680 (2013).
- 54 Chen, X., Kalbacher, H. & Grunder, S. The tarantula toxin psalmotoxin 1 inhibits acid-sensing ion channel (ASIC) 1a by increasing its apparent H<sup>+</sup> affinity. *The Journal of general physiology* **126**, 71-79, doi:10.1085/jgp.200509303 (2005).
- 55 Bacongus, I. & Gouaux, E. Structural plasticity and dynamic selectivity of acid-sensing ion channel-spider toxin complexes. *Nature* **489**, 400-405, doi:10.1038/nature11375 (2012).
- 56 Samways, D. S., Harkins, A. B. & Egan, T. M. Native and recombinant ASIC1a receptors conduct negligible Ca<sup>2+</sup> entry. *Cell Calcium* **45**, 319-325, doi:10.1016/j.ceca.2008.12.002 (2009).
- 57 Sun, D. *et al.* Structural insights into human acid-sensing ion channel 1a inhibition by snake toxin mambalgin1. *Elife* **9**, doi:10.7554/eLife.57096 (2020).
- 58 Li, T., Yang, Y. & Canessa, C. M. Interaction of the aromatics Tyr-72/Trp-288 in the interface of the extracellular and transmembrane domains is essential for proton gating of acid-sensing ion channels. *J Biol Chem* **284**, 4689-4694, doi:10.1074/jbc.M805302200 (2009).

- 59 Coric, T., Zhang, P., Todorovic, N. & Canessa, C. M. The extracellular domain determines the kinetics of desensitization in acid-sensitive ion channel 1. *J Biol Chem* **278**, 45240-45247, doi:10.1074/jbc.M304441200 (2003).
- 60 Klipp, R. C., Cullinan, M. M. & Bankston, J. R. Insights into the molecular mechanisms underlying the inhibition of acid-sensing ion channel 3 gating by stomatin. *The Journal of general physiology* **152**, doi:10.1085/jgp.201912471 (2020).
